# Supplementary material
Source: publisher figshare collection journal article supplement (https://springernature.figshare.com/ndownloader/files/20990565)
Supplement: Supplementary file [file 20990565]

## Supplement 1.

### Imaging protocol, WB-MRI.

|                            |                       |  |                         |                       |
|----------------------------|-----------------------|--|-------------------------|-----------------------|
| WB-MRI                     | 1.5 T (Siemens Area)  |  |                         |                       |
| Sequence                   | SSFSE/HASTE<br>Fat ST |  | DIXON                   | T2/EPI<br>b50_400_800 |
|                            | T2                    |  | T1                      | DWI                   |
| Orientation                | Axial                 |  | Axial                   | Axial                 |
| TR/TE (ms)                 | 1000/82               |  | 165/                    | 5600/60               |
| Field of view (mm)         | 400x275               |  | 416/315                 | 420/338               |
| Matris                     | 256/123               |  | 256/134                 | 192/156               |
| Slice thickness/fsk (mm)   | 5/1                   |  | 5/1                     | 5/1                   |
| NEX                        | 1                     |  | 1                       | 4                     |
| Number of slice partitions | 208                   |  | 216                     | 210                   |
| Pixel bandwidth            | 500                   |  | 475                     | 1735                  |
| Coverage                   | Neck-below<br>knees   |  | Neck-<br>below<br>knees | Neck-below<br>knees   |
| Scan time                  |                       |  |                         |                       |

### Imaging protocol details

The imaging protocol consist of DIXON T1-weighted, single-shot TIRM (turbo inversion recovery magnitude), and DWI-EPI (diffusion weighted echo planar imaging) with three different b-values (50, 400 and 800), all in a transversal plane. For the brain, a transversal T1-weighted MPRAGE (Magnetization Prepared Rapid Gradient Echo) is used. For the women, we add a breast protocol before and after intravenous contrast agent (Gadolinium), which is also used for the brain MRI. Male patients do not receive any contrast agent.
